# Supplementary material for: Mechanisms that regulate the C1-C2B mutual inhibition control functional switch of UNC-13
Source: eLife. 2025 Apr 11;14:RP105199. doi: 10.7554/eLife.105199 (PMC11991699; doi:10.7554/eLife.105199)
Supplement: Supplementary file 1. — The electrophysiology data from all strains used in this study are shown in the table (by mean ± SEM). [file elife-105199-supp1.xlsx]

## Sheet: Table 1
	Table 1. Summary of all electrophysiology data in this study
		mEPSC (0mM Ca2+)		mEPSC (1mM Ca2+)		mIPSC (0mM Ca2+)		mIPSC (1mM Ca2+)		Evoked EPSC
		frequency (Hz)	amplitude (-pA)	frequency (Hz)	amplitude (-pA)	frequency (Hz)	amplitude (pA)	frequency (Hz)	amplitude (pA)	amplitude (-nA)	charge transfer (-pC)
	Wild type	3.2±0.93	18.8±0.71	49.4±6.83	20.9±1.50	12.9±1.71	20.3±1.45	47.2±5.62	20.9±1.84	1.95±0.15	17.8±1.45
	unc-13 (s69)	N/A	N/A	0.481±0.09	16.8±1.76	N/A	N/A	0.4±0.32	20.9±1.25	0.015±0.005	0.317±0.139
	UNC-13L	2.5±0.42	17.2±0.88	43.2±5.91	19.6±0.71	10.9±0.61	19.9±0.81	43.7±3.92	22.6±1.14	1.8±0.2	14.9±1.45
	LHK	2.1±0.35	16.8±0.57	41.6±6.74	21.2±2.17	16.7±1.79	28.4±1.14	41.8±5.56	25.1±1.07	1.85±0.25	14.1±1.71
	LD1-5N	8.9±2.6	24.1±1.22	58.6±2.83	25.6±0.71	33.7±2.42	26.4±0.85	48.7±5.0	26.7±1.31	2.85±0.18	28.8±1.76
	LHK+D1-5N	2.7±0.41	20.4±0.85	46.1±5.42	20.3±0.79	13.8±1.09	21.1±0.98	51.9±8.33	26.5±2.04	1.9±0.16	15.5±1.43
	LD3,4N	3.68±1.16	24.7±1.78	41.6±4.17	22.7±1.11	27.1±2.33	23.4±0.68	41.3±5.27	24.9±3.74	2.83±0.12	24.6±0.72
	LHK+D3,4N	1.24±0.18	20.1±1.01	49.9±7.23	20.3±0.79	10.8±0.88	24.8±2.47	51.9±8.33	26.5±2.04	2.03±0.14	17.6±1.61
	UNC-13R	1.2±0.18	17.8±0.55	28.2±4.1	20.7±1.71	12.2±0.984	28.9±1.24	34.4±3.39	23.6±0.98	1.8±0.11	20.2±1.86
	RHK	1.5±0.3	23.1±1.07	37.5±4.55	19.2±1.02	24.1±1.94	24.2±0.88	39.0±4.09	23.1±0.34	2.7±0.22	33.8±3.24
	RD1-5N	2.5±0.67	16.7±1.71	32.1±2.94	20.1±1.17	19.0±1.94	20.6±1.48	28.4±3.53	22.1±1.58	2.7±0.15	34.4±2.66
	RHK+D1-5N	0.75±0.23	17.2±1.47	25.9±3.46	19.4±1.73	12.3±1.93	21.1±0.72	27.8±3.44	23.4±1.17	1.5±0.14	17.1±2.12
	UNC-13DC2A	1.2±0.2	19.6±1.14	25.3±4.32	22.7±1.23	5.6±0.50	25.6±1.6	41.6±6.64	26.9±2.03	0.78±0.1	6.24±1.22
	DC2AHK	1.6±0.19	20.6±1.17	45.5±3.26	21.7±1.16	17.1±1.39	26.2±1.76	41.1±4.46	23.3±1.22	2.3±0.24	23.1±4.64
	DC2AD1-5N	3.7±0.98	20.9±2.23	40.8±4.30	19.6±1.21	12.2±0.66	22.4±1.7	40.9±4.69	26.2±2.93	1.9±0.18	19.4±1.47
	DC2AHK+D1-5N	3.5±1.1	18.2±1.79	48.3±8.31	22.4±1.84	12.7±1.67	22.9±1.63	46.8±4.40	27.9±1.72	1.8±0.23	22.1±7.67
	UNC-13DX	1.7±0.48	23.2±0.80	42.7±4.24	23.1±1.71	14.6±0.98	25.6±1.07	51.7±7.25	24.9±1.07	2.8±0.16	33.9±5.5
	DXHK	7.4±2.11	18.9±0.73	42.9±2.89	22.1±0.79	25.5±2.54	21.4±0.86	47.3±4.23	22.4±1.01	2.9±0.28	39.1±4.92
	DXD1-5N	5.9±1.41	22.1±1.17	49.8±5.72	19.3±0.82	28.1±2.17	23.6±0.88	48.5±4.74	25.8±3.37	2.2±0.22	29.3±4.55
	DXHK+D1-5N	2.5±0.45	19.8±1.46	42.2±5.54	19.3±0.57	19.6±1.66	24.1±1.73	43.7±2.42	25.5±1.40	2.0±0.15	30.8±5.5
	MUNC2C	1.8±0.54	18.8±2.11	16.6±2.54	19.2±1.29	3.7±0.42	23.7±1.52	37.5±5.47	32.4±1.76	0.62±0.09	5.4±0.934
	C1MUNC2C	3.7±0.91	25.2±2.13	38.7±4.72	25.9±1.62	12.1±1.64	21.9±1.24	43.9±6.12	28.0±2.50	2.3±0.27	26.3±5.26
	C1HKMUNC2C	1.6±0.44	20.1±1.76	20.3±4.23	23.5±2.41	5.9±1.68	25.6±2.36	26.1±3.49	24.2±2.06	0.57±0.21	4.91±2.15
	C2BMUNC2C	6.8±1.60	24.5±1.15	47.3±7.57	23.1±1.97	27.1±1.99	26.9±1.07	46.2±4.16	22.8±1.81	2.6±0.2	36.0±4.31
	C2BD1-5NMUNC2C	8.8±2.50	21.5±1.39	42.8±3.43	24.4±1.41	23.3±3.0	20.8±0.74	41.1±2.39	26.2±0.91	2.4±0.19	32.2±4.66
	C2Blinker3MUNC2C	7.8±1.11	25.3±1.95	40.9±3.42	21.6±0.92	19.1±1.99	25.8±2.11	50.1±3.55	27.1±1.77	2.7±0.17	34.9±4.95
	C2BD1-5Nlinker3MUNC2C	4.5±1.7	27.7±1.76	35.3±3.34	19.5±0.64	20.2±2.52	23.1±0.89	45.6±3.68	22.9±1.43	1.7±0.14	18.2±2.37
	C1C2BMUNC2C	2.8±0.61	22.4±1.35	29.5±4.57	24.1±1.69	16.3±1.91	23.3±1.42	46.5±4.77	24.3±1.08	3.0±0.26	37.3±5.47
	C2BK/QMUNC2C	2.1±0.21	19.8±1.3	35.4±3.59	19.2±0.82	7.92±0.76	22.7±1.30	20.6±2.35	24.7±1.15	0.96±0.15	8.59±1.71
	C2BK/Qlinker3MUNC2C	2.6±0.56	22.4±1.15	18.3±2.47	18.9±0.95	9.5±0.96	25.0±1.46	16.5±2.53	22.5±1.50	0.82±0.14	5.98±1.26
	UNC-13S	0.62±0.1	14.8±0.65	18.7±3.22	19.6±0.78	3.7±0.87	24.4±1.59	22.7±2.04	27.2±1.11	1.1±0.11	12.4±1.75
	SHK	0.68±0.1	15.2±0.59	19.7±4.93	18.1±0.86	14.9±2.16	21.2±1.41	25.6±5.58	24.6±2.92	2.0±0.18	22.0±3.44
	SD1-5N	0.74±0.1	20.6±1.5	15.7±5.13	20.1±1.38	14.3±1.38	23.7±0.46	17.8±3.05	25.7±1.28	1.7±0.13	21.8±3.97
	SHK+D1-5N	0.42±0.08	15.1±0.37	6.1±1.07	20.2±1.81	1.3±0.54	16.1±0.97	4.16±2.33	19.4±1.12	0.11±0.032	0.62±0.17

## Sheet: Sheet1
Mean	Std. Error of Mean
20.9	1.84	20.9±1.84
20.9	1.25	20.9±1.25
22.6	1.14	22.6±1.14
25.1	1.07	25.1±1.07				Mean	20.9	20.9	22.6	25.1	26.7	26.5	23.6	23.1	22	23.4	26.9	23.3	26.2	27.9	24.9	22.4	25.8	25.5	32.4	28	24.2	22.8	26.2	27.1	22.9	24.3	24.7	22.5	27.2	24.6	25.7	19.4
26.7	1.31	26.7±1.31				Std. Deviation	5.81	2.5	2.8	2.63	3.21	5.01	4.18	1.03	4.74	3.31	5.38	2.98	7.74	4.54	2.63	2.66	9.52	6.08	4.66	6.63	5.05	4.03	2.59	6.12	3.78	3.75	4.47	5.83	4.29	7.14	4.23	3.37
26.5	2.04	26.5±2.04				Std. Error of Mean	1.84	1.25	1.14	1.07	1.31	2.04	0.986	0.343	1.58	1.17	2.03	1.22	2.93	1.72	1.07	1.01	3.37	1.4	1.76	2.5	2.06	1.8	0.917	1.77	1.43	1.08	1.15	1.5	1.11	2.92	1.28	1.12
23.6	0.986	23.6±0.986
23.1	0.343	23.1±0.343
22	1.58	22±1.58
23.4	1.17	23.4±1.17
26.9	2.03	26.9±2.03
23.3	1.22	23.3±1.22
26.2	2.93	26.2±2.93
27.9	1.72	27.9±1.72
24.9	1.07	24.9±1.07
22.4	1.01	22.4±1.01
25.8	3.37	25.8±3.37
25.5	1.4	25.5±1.4
32.4	1.76	32.4±1.76
28	2.5	28±2.5
24.2	2.06	24.2±2.06
22.8	1.8	22.8±1.8
26.2	0.917	26.2±0.917
27.1	1.77	27.1±1.77
22.9	1.43	22.9±1.43
24.3	1.08	24.3±1.08
24.7	1.15	24.7±1.15
22.5	1.5	22.5±1.5
27.2	1.11	27.2±1.11
24.6	2.92	24.6±2.92
25.7	1.28	25.7±1.28
19.4	1.12	19.4±1.12
